# Supplementary material for: APOGEE 2: multi-layer machine-learning model for the interpretable prediction of mitochondrial missense variants
Source: Springer Nature journal article supplement (doi:10.1038/s41467-023-40797-7), 2023-08-19
Supplement: MOESM14 [file 41467_2023_40797_MOESM14_ESM.pdf]

## Reporting Summary

Nature Portfolio wishes to improve the reproducibility of the work that we publish. This form provides structure for consistency and transparency in reporting. For further information on Nature Portfolio policies, see our [Editorial Policies](#) and the [Editorial Policy Checklist](#).

### Statistics

For all statistical analyses, confirm that the following items are present in the figure legend, table legend, main text, or Methods section.

n/a Confirmed

- ☐ ☒ The exact sample size ( $n$ ) for each experimental group/condition, given as a discrete number and unit of measurement
- ☒ ☐ A statement on whether measurements were taken from distinct samples or whether the same sample was measured repeatedly
- ☐ ☒ The statistical test(s) used AND whether they are one- or two-sided  
*Only common tests should be described solely by name; describe more complex techniques in the Methods section.*
- ☐ ☒ A description of all covariates tested
- ☐ ☒ A description of any assumptions or corrections, such as tests of normality and adjustment for multiple comparisons
- ☐ ☒ A full description of the statistical parameters including central tendency (e.g. means) or other basic estimates (e.g. regression coefficient) AND variation (e.g. standard deviation) or associated estimates of uncertainty (e.g. confidence intervals)
- ☐ ☒ For null hypothesis testing, the test statistic (e.g.  $F$ ,  $t$ ,  $r$ ) with confidence intervals, effect sizes, degrees of freedom and  $P$  value noted  
*Give  $P$  values as exact values whenever suitable.*
- ☐ ☒ For Bayesian analysis, information on the choice of priors and Markov chain Monte Carlo settings
- ☐ ☒ For hierarchical and complex designs, identification of the appropriate level for tests and full reporting of outcomes
- ☐ ☒ Estimates of effect sizes (e.g. Cohen's  $d$ , Pearson's  $r$ ), indicating how they were calculated

Our web collection on [statistics for biologists](#) contains articles on many of the points above.

### Software and code

Policy information about [availability of computer code](#)

Data collection No software was used for data collection

Data analysis MD simulation data was obtained and analyzed using Amber 20 and AmberTools21.  
In-silico mutagenesis was performed with UCSF Chimera 1.16  
In-silico protein systems were refined with MODELLER 9.16  
Energetic analysis of protein structures performed using FoldX 5.0  
Some statistical analyses were performed using SciPy v1  
Most of the machine learning algorithms were borrowed from Python's scikit-learn v1.2.1.  
Custom scripts written with Python 3.9  
  
Pathogenicity predictors (no version available if not provided): PolyPhen2, SIFT 5.0.3, fathmm 2.2, PROVEAN 1.3, MutationAssessor 2.0, EFIN, CADD 1.3, PANTHER, PhD-SNP, SNAP, MutationTaster2  
  
Custom code available at <https://github.com/mazzalab/playgrounds> as a Colab notebook. DOI: 10.5281/zenodo.8137948

For manuscripts utilizing custom algorithms or software that are central to the research but not yet described in published literature, software must be made available to editors and reviewers. We strongly encourage code deposition in a community repository (e.g. GitHub). See the Nature Portfolio [guidelines for submitting code & software](#) for further information.

## Data

Policy information about [availability of data](#)

All manuscripts must include a [data availability statement](#). This statement should provide the following information, where applicable:

- Accession codes, unique identifiers, or web links for publicly available datasets
- A description of any restrictions on data availability
- For clinical datasets or third party data, please ensure that the statement adheres to our [policy](#)

The datasets supporting the conclusions of this article are included within the article and its Supplementary Data files.

The APOGEE 2 probabilities/classes of pathogenicity and the whole MitImpact database can be freely downloaded from <http://mitimpact.css-mendel.it>.

Datasets 2 and 3 are freely available from GnomAD [ <https://gnomad.broadinstitute.org>] and HelixMTdb [ <https://www.helix.com/pages/mitochondrial-variant-database>], respectively. Dataset 4 is freely available from MITOMAP [ <https://mitomap.org/MITOMAP/Benign>].

ClinVar is freely available at <https://ftp.ncbi.nlm.nih.gov/pub/clinvar/>.

PDB IDs:

5xtc [ <http://doi.org/10.2210/pdb5xtc/pdb>] of the Respiratory Complex I

5z62 [ <http://doi.org/10.2210/pdb5z62/pdb>] for the Cytochrome C Oxidase

5xte [ <http://doi.org/10.2210/pdb5xte/pdb>] for the Respiratory Complex III

## Human research participants

Policy information about [studies involving human research participants and Sex and Gender in Research](#).

Reporting on sex and gender

Population characteristics

Recruitment

Ethics oversight

Note that full information on the approval of the study protocol must also be provided in the manuscript.

## Field-specific reporting

Please select the one below that is the best fit for your research. If you are not sure, read the appropriate sections before making your selection.

☒ Life sciences ☐ Behavioural & social sciences ☐ Ecological, evolutionary & environmental sciences

For a reference copy of the document with all sections, see [nature.com/documents/nr-reporting-summary-flat.pdf](https://nature.com/documents/nr-reporting-summary-flat.pdf)

## Life sciences study design

All studies must disclose on these points even when the disclosure is negative.

Sample size

Data exclusions

Replication

Randomization

Blinding

## Reporting for specific materials, systems and methods

We require information from authors about some types of materials, experimental systems and methods used in many studies. Here, indicate whether each material, system or method listed is relevant to your study. If you are not sure if a list item applies to your research, read the appropriate section before selecting a response.

Materials & experimental systems

|                                     |                                                        |
|-------------------------------------|--------------------------------------------------------|
| n/a                                 | Involved in the study                                  |
| <input checked="" type="checkbox"/> | <input type="checkbox"/> Antibodies                    |
| <input checked="" type="checkbox"/> | <input type="checkbox"/> Eukaryotic cell lines         |
| <input checked="" type="checkbox"/> | <input type="checkbox"/> Palaeontology and archaeology |
| <input checked="" type="checkbox"/> | <input type="checkbox"/> Animals and other organisms   |
| <input checked="" type="checkbox"/> | <input type="checkbox"/> Clinical data                 |
| <input checked="" type="checkbox"/> | <input type="checkbox"/> Dual use research of concern  |

Methods

|                                     |                                                 |
|-------------------------------------|-------------------------------------------------|
| n/a                                 | Involved in the study                           |
| <input checked="" type="checkbox"/> | <input type="checkbox"/> ChIP-seq               |
| <input checked="" type="checkbox"/> | <input type="checkbox"/> Flow cytometry         |
| <input checked="" type="checkbox"/> | <input type="checkbox"/> MRI-based neuroimaging |
